# Supplementary material for: Proficient brain for optimal performance: the MAP model perspective
Source: PeerJ. 2016 May 25;4:e2082. doi: 10.7717/peerj.2082 (PMC4888308; doi:10.7717/peerj.2082)
Supplement: Supplemental Information 4 [file peerj-04-2082-s004.xlsx]

## Sheet: Foglio1
Shooter	Performance Type	Results	Control Level on Core Components
1	1	10.4 (0.1)	3.5 (0.6)
	2	10.5 (0.1)	5.6 (1.0)
	3	9.9 (0.1)	5.3 (0.5)
	4	9.7 (0.3)	3.2 (0.8)
2	1	10.3 (0.2)	2.6 (0.5)
	2	10.3 (0.1)	5.03 (1.4)
	3	9.6 (0.3)	5.3 (1.3)
	4	9.6 (0.3)	2.5 (0.5)
3	1	10.4 (0.1)	5.6 (0.4)
	2	10.5 (0.1)	7.2 (0.4)
	3	9.9 (0.2)	7.2(0.5)
	4	9.8 (0.3)	4.6 (1.0)
4	1	10.7 (0.1)	4 (0)
	2	10.6 (0.1)	5.3 (0.4)
	3	10.1 (0.2)	5.1 (0.3)
	4	9.9 (0.3)	3.8 (0.3)
5	1	10.6 (0.1)	4.7 (0.4)
	2	10.5 (0.1)	6.2 (0.5)
	3	10.1 (0.1)	6.4 (0.5)
	4	9.9 (0.3)	4.2 (0.8)
6	1	10.5 (0.1)	4.8 (1.1)
	2	10.5 (0.1)	7.6 (0.6)
	3	9.8 (0.3)	7.9 (0.9)
	4	9.9 (0.2)	4.8 (0.9)
7	1	10.6 (0.1)	5.7 (0.5)
	2	10.6 (0.1)	7.1 (0.6)
	3	10.2(0.1)	7 (0.2)
	4	10.1 (0.1)	5.4 (0.7)
8	1	10.5 (0.1)	5.2 (0.1)
	2	10.4(0.1)	6.8 (0.2)
	3	9.9 (0.2)	6.7(0.1)
	4	9.6 (0.3)	5.5 (0.1)
9	1	10.6 (0.2)	5.2(0.1)
	2	10.4 (0.3)	7.1 (0.2)
	3	9.8 (0.1)	6.8 (0.2)
	4	9.7 (0.2)	5.1 (0.1)
10	1	10.5 (0.1)	4.6 (0.2)
	2	10.2 (0.1)	6.8 (0.1)
	3	9.7 (0.3)	6.7 (0.1)
	4	9.4 (0.1)	4.8 (0.2)
